# Supplementary material
Source: PubMed Central journal article supplement (PMC2922071)
Supplement: Supp_Data.pdf [file Supp_Data.pdf]

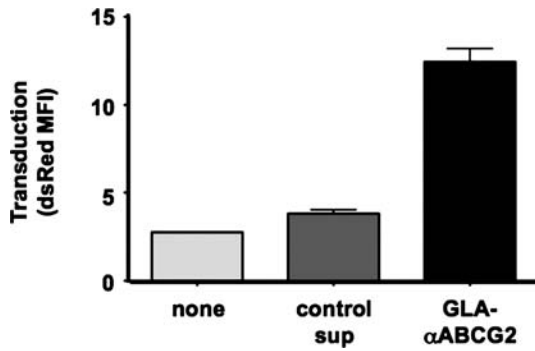

**SUPPLEMENTARY FIG. 1.** An ScFv derived from the ABCG2 hybridoma cell line 5D3 was fused to GLA-EGF. The secreted fusion protein was incubated with Ad-Red virus and then applied to CHO cells stably transfected to express ABCG2. Twenty-four hours postinfection cells were analyzed for dsRed expression by flow cytometry, using a FACScan.

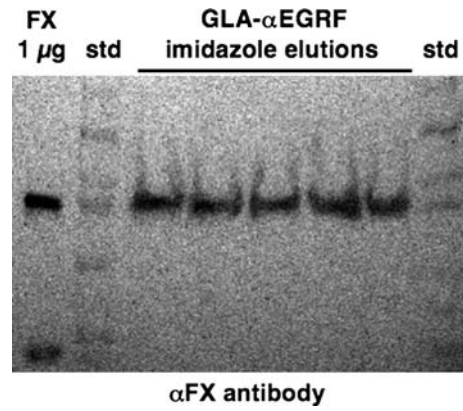

**SUPPLEMENTARY FIG. 2.** Quantitative  $\alpha$ -GLA Western blot, using FX standards. Standards are compared with elution fractions of nickel-purified GLA- $\alpha$ EGFR protein.

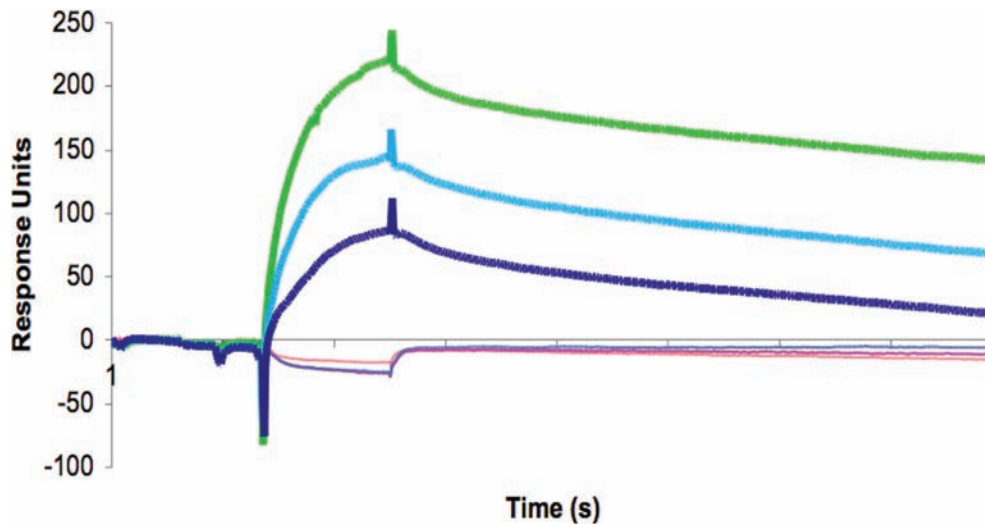

**SUPPLEMENTARY FIG. 3.** Surface plasmon resonance (SPR) analysis of adenovirus binding to GLA-EGF-EGFR ScFv. Replicate measurements from the most concentrated are shown on the sensorgram (green, sky blue, navy blue). Buffer control replicate measurements are shown for comparison (pink, magenta, corn blue). Arrows indicate the start and end of injection.

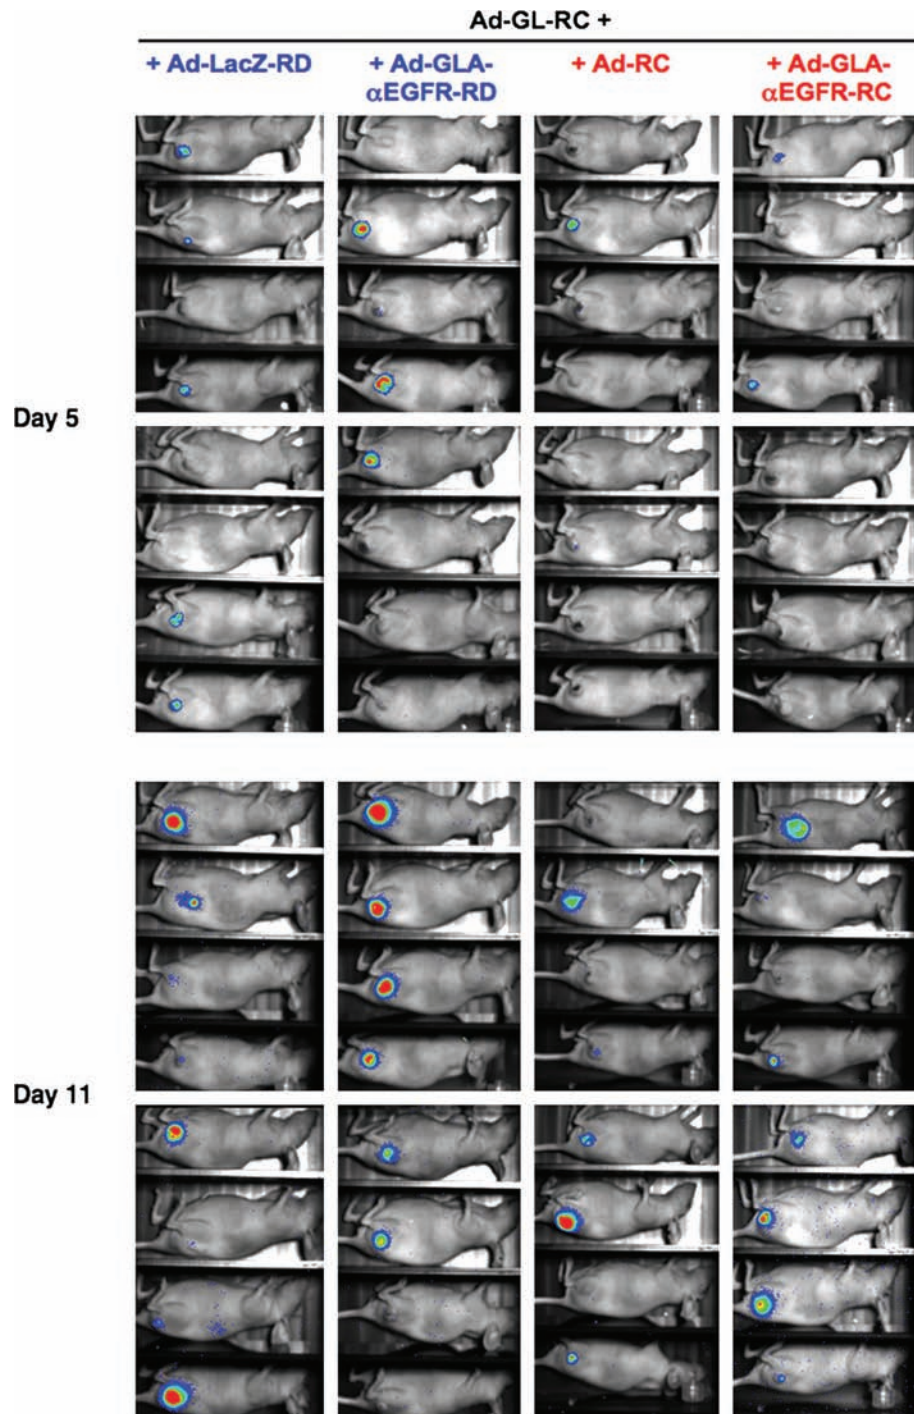

**SUPPLEMENTARY FIG. 4.** Luciferase imaging of subcutaneous SKOV-3 tumors from Fig. 7 on days 5 and 11 after intratumoral injection of viruses.
